# Supplementary material for: The Net Financial Benefits of Single Vendor Integrated CDMO and CRO Drug Development Services
Source: Research Square preprint supplement (doi:10.21203/rs.3.rs-6531199/v1), 2025-05-07
Supplement: Supplementary file 1 [file 0f547f25bb5ed91f7cb25ad2.pdf]

**SUPPLEMENTAL DATA FILE**

**INTEGRATION OF CRO AND CDMO SERVICES WITH A SINGLE VENDOR: NET  
FINANCIAL GAINS FOR CLINICAL TRIALS**

**Joseph A. DiMasi,<sup>1</sup> Abigail Dirks,<sup>1</sup> Kenneth A. Getz,<sup>1</sup>**

<sup>1</sup> Tufts Center for the Study of Drug Development, Tufts University

**Table S1. Reduction in Trial Cycle Times with Integrated CDMO-CRO Services for mAb Oncology Indications by Grouped Services**

|                | Reduction in Phase Duration (mos.) |                  |               |           |                    |
|----------------|------------------------------------|------------------|---------------|-----------|--------------------|
|                | Full Model                         | DS+DP+GMP Lab+CS | DS+DP+GMP Lab | DP+CS+CRO | CS+CRO+Central Lab |
| <b>Phase 1</b> | 12.7                               | 11.5             | 9.7           | 3.5       | 2.7                |
| <b>Phase 2</b> | 6.8                                | 3.0              | 2.1           | 6.0       | 3.5                |
| <b>Phase 3</b> | 14.5                               | 9.0              | 6.7           | 6.0       | 3.5                |

DS = drug substance; DP = drug product; GMP = Good Manufacturing Practices; CS = clinical supplies

**Figure S1. Gains in eNPV (thousands 2023 USD) per Investigational mAb Oncology Indication with Integrated CDMO-CRO Solutions by Grouped Services (multiple phases)**

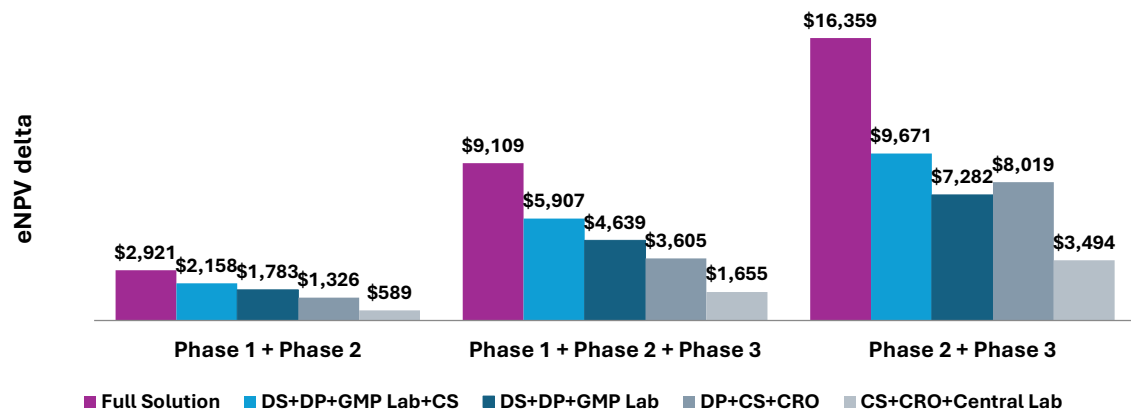

Costs and benefits discounted to the start of the earliest phase

eNPV delta = difference in eNPV for sponsors between conducting all trials for an oncology indication in the given phases using a single vendor versus using a multi-vendor industry solution.

**Figure S2. Gains in eNPV (thousands 2023 USD) per Investigational mAb Oncology Indication with Integrated CDMO-CRO Solutions by Grouped Services (single phases)**

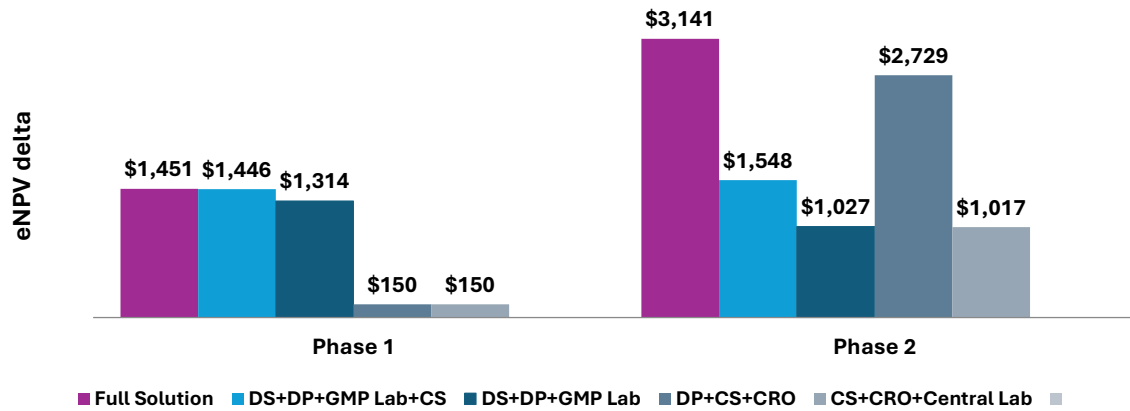

Costs and benefits discounted to the start of the earliest phase

eNPV delta = difference in eNPV for sponsors between conducting all trials for an oncology indication in the given phases using a single vendor versus using a multi-vendor industry solution.

**Figure S3. Gains in eNPV (thousands 2023 USD) per Investigational mAb Oncology Indication with Integrated CDMO-CRO Solutions by Grouped Services (phase 3)**

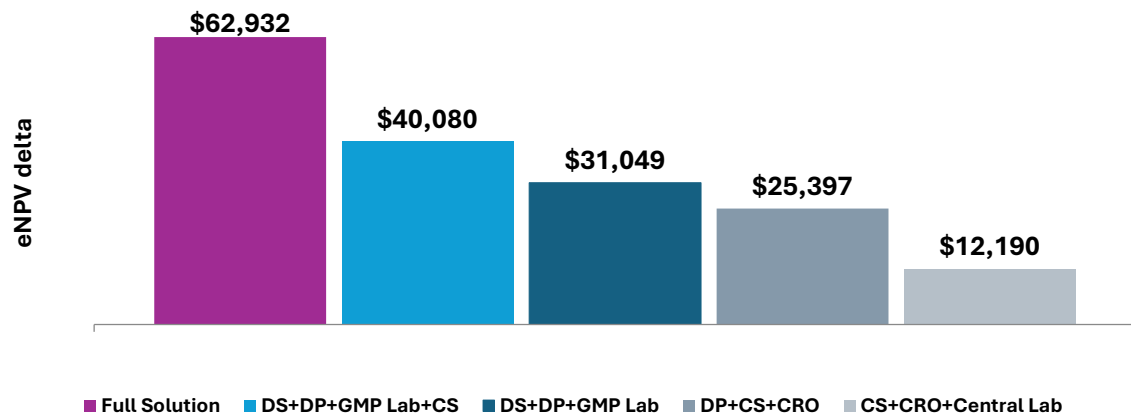

Costs and benefits discounted to the start of the earliest phase

eNPV delta = difference in eNPV for sponsors between conducting all trials for an oncology indication in the given phases using a single vendor versus using a multi-vendor industry solution.

**Table S2. Incremental eNPV (thousands 2023 USD) for Integrated Services (full range of capabilities) for mAb Oncology Indications by Mean Phase Cost**

|         | Percent of Base Case |          |          |
|---------|----------------------|----------|----------|
|         | Base (100)%          | -20%     | +20%     |
| Phase 1 | \$1,451              | \$1,577  | \$1,325  |
| Phase 2 | \$3,141              | \$3,285  | \$2,998  |
| Phase 3 | \$62,932             | \$66,013 | \$59,851 |

Costs and benefits discounted to the start of the earliest phase  
eNPV delta = difference in eNPV for sponsors between conducting all trials for an oncology indication in the given phase using a single vendor vs a multi-vendor industry solution.

**Figure S4. eNPV delta (thousands 2023 USD) for Integrated Services with Full Capabilities for Multiple Clinical Phases (Phase 1 + Phase 2 + Phase 3) for mAb oncology indications**

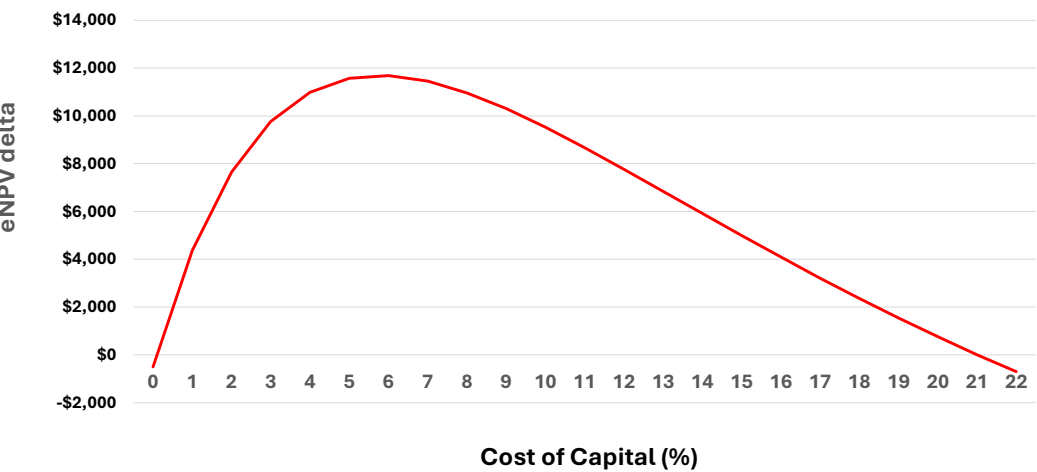

**Table S3. Incremental eNPV (thousands 2023 USD) for Integrated Services (full range of capabilities) for mAb Oncology Indications for Individual and Multiple Phases by the Cost of Capital**

|                                    | Cost of Capital |              |          |
|------------------------------------|-----------------|--------------|----------|
|                                    | 7.0%            | 10.5% (base) | 14.0%    |
| <b>Phase 1</b>                     | \$2,850         | \$1,451      | -\$127   |
| <b>Phase 2</b>                     | \$4,254         | \$3,141      | \$1,651  |
| <b>Phase 3</b>                     | \$62,755        | \$62,932     | \$57,198 |
| <b>Phase 1 + Phase 2</b>           | \$4,868         | \$2,921      | \$636    |
| <b>Phase 1 + Phase 2 + Phase 3</b> | \$11,450        | \$9,109      | \$5,919  |
| <b>Phase 2 + Phase 3</b>           | \$18,128        | \$16,359     | \$13,085 |

Costs and benefits discounted to the start of the earliest phase

eNPV delta = difference in eNPV for sponsors between conducting all trials for an oncology indication in the given phase using a single vendor vs a multi-vendor industry solution.



**Table S4. Incremental eNPV (thousands 2023 USD) for Integrated Services (full range of capabilities) for mAb Oncology Indications for Individual and Multiple Phases by Molecule Peak Annual Net Sales**

|                                    | Molecule Peak Annual Net Sales |                |                |
|------------------------------------|--------------------------------|----------------|----------------|
|                                    | \$2,878 (-25%)                 | \$3,837 (base) | \$4,796 (+25%) |
| <b>Phase 1</b>                     | -\$93                          | \$1,451        | \$2,995        |
| <b>Phase 2</b>                     | \$1,212                        | \$3,141        | \$5,070        |
| <b>Phase 3</b>                     | \$42,878                       | \$62,932       | \$82,987       |
| <b>Phase 1 + Phase 2</b>           | \$475                          | \$2,921        | \$5,368        |
| <b>Phase 1 + Phase 2 + Phase 3</b> | \$4,690                        | \$9,109        | \$13,527       |
| <b>Phase 2 + Phase 3</b>           | \$10,218                       | \$16,359       | \$22,500       |

Costs and benefits discounted to the start of the earliest phase

eNPV delta = difference in eNPV for sponsors between conducting all trials for an oncology indication in the given phase using a single vendor vs a multi-vendor industry solution.

**Table S5. Incremental eNPV (thousands 2023 USD) for Integrated Services (full range of capabilities) for mAb Oncology Indications for Individual and Multiple Phases by Years to Peak Sales**

|                                    | Years to Peak Sales |          |          |
|------------------------------------|---------------------|----------|----------|
|                                    | 7                   | 8 (base) | 9        |
| <b>Phase 1</b>                     | \$1,571             | \$1,451  | \$1,340  |
| <b>Phase 2</b>                     | \$3,291             | \$3,141  | \$4,973  |
| <b>Phase 3</b>                     | \$64,489            | \$62,932 | \$61,493 |
| <b>Phase 1 + Phase 2</b>           | \$3,111             | \$2,921  | \$2,746  |
| <b>Phase 1 + Phase 2 + Phase 3</b> | \$9,452             | \$9,109  | \$8,792  |
| <b>Phase 2 + Phase 3</b>           | \$16,835            | \$16,359 | \$15,918 |

Costs and benefits discounted to the start of the earliest phase

eNPV delta = difference in eNPV for sponsors between conducting all trials for an oncology indication in the given phase using a single vendor vs a multi-vendor industry solution.

**Table S6. Incremental eNPV (thousands 2023 USD) for Integrated Services (full range of capabilities) for mAb Oncology Indications for Individual and Multiple Phases by Years of Market Exclusivity**

|                                    | Years of Market Exclusivity |          |          |          |          |
|------------------------------------|-----------------------------|----------|----------|----------|----------|
|                                    | 11 (base)                   | 12       | 13       | 14       | 15       |
| <b>Phase 1</b>                     | \$1,451                     | \$1,604  | \$1,741  | \$1,862  | \$1,970  |
| <b>Phase 2</b>                     | \$3,141                     | \$3,333  | \$3,503  | \$3,655  | \$3,790  |
| <b>Phase 3</b>                     | \$62,932                    | \$64,921 | \$66,697 | \$68,277 | \$69,677 |
| <b>Phase 1 + Phase 2</b>           | \$2,921                     | \$3,164  | \$3,381  | \$3,573  | \$3,744  |
| <b>Phase 1 + Phase 2 + Phase 3</b> | \$9,109                     | \$9,547  | \$9,938  | \$10,286 | \$10,595 |
| <b>Phase 2 + Phase 3</b>           | \$16,359                    | \$16,968 | \$17,512 | \$17,996 | \$18,424 |

Costs and benefits discounted to the start of the earliest phase

eNPV delta = difference in eNPV for sponsors between conducting all trials for an oncology indication in the given phase using a single vendor vs a multi-vendor industry solution.

**Figure S5. Gains in eNPV (thousands 2023 USD) per Investigational mAb Oncology Indication with Integrated CDMO-CRO Solutions and Extended Length of Market Exclusivity**

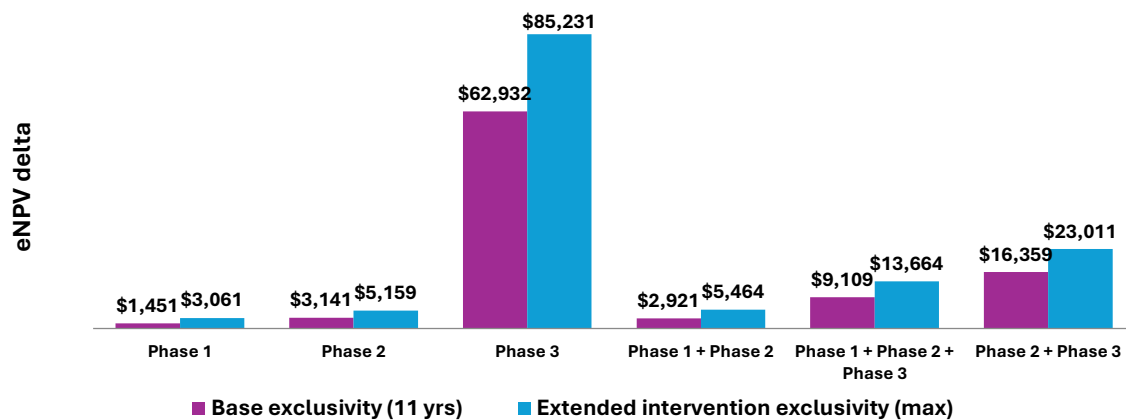

Costs and benefits discounted to the start of the earliest phase

eNPV delta = difference in eNPV for sponsors between conducting all trials for an oncology indication in the given phases using a single vendor versus using a multi-vendor industry solution.
